# Supplementary material
Source: PubMed Central journal article supplement (PMC9176295)

Supplementary figure 2

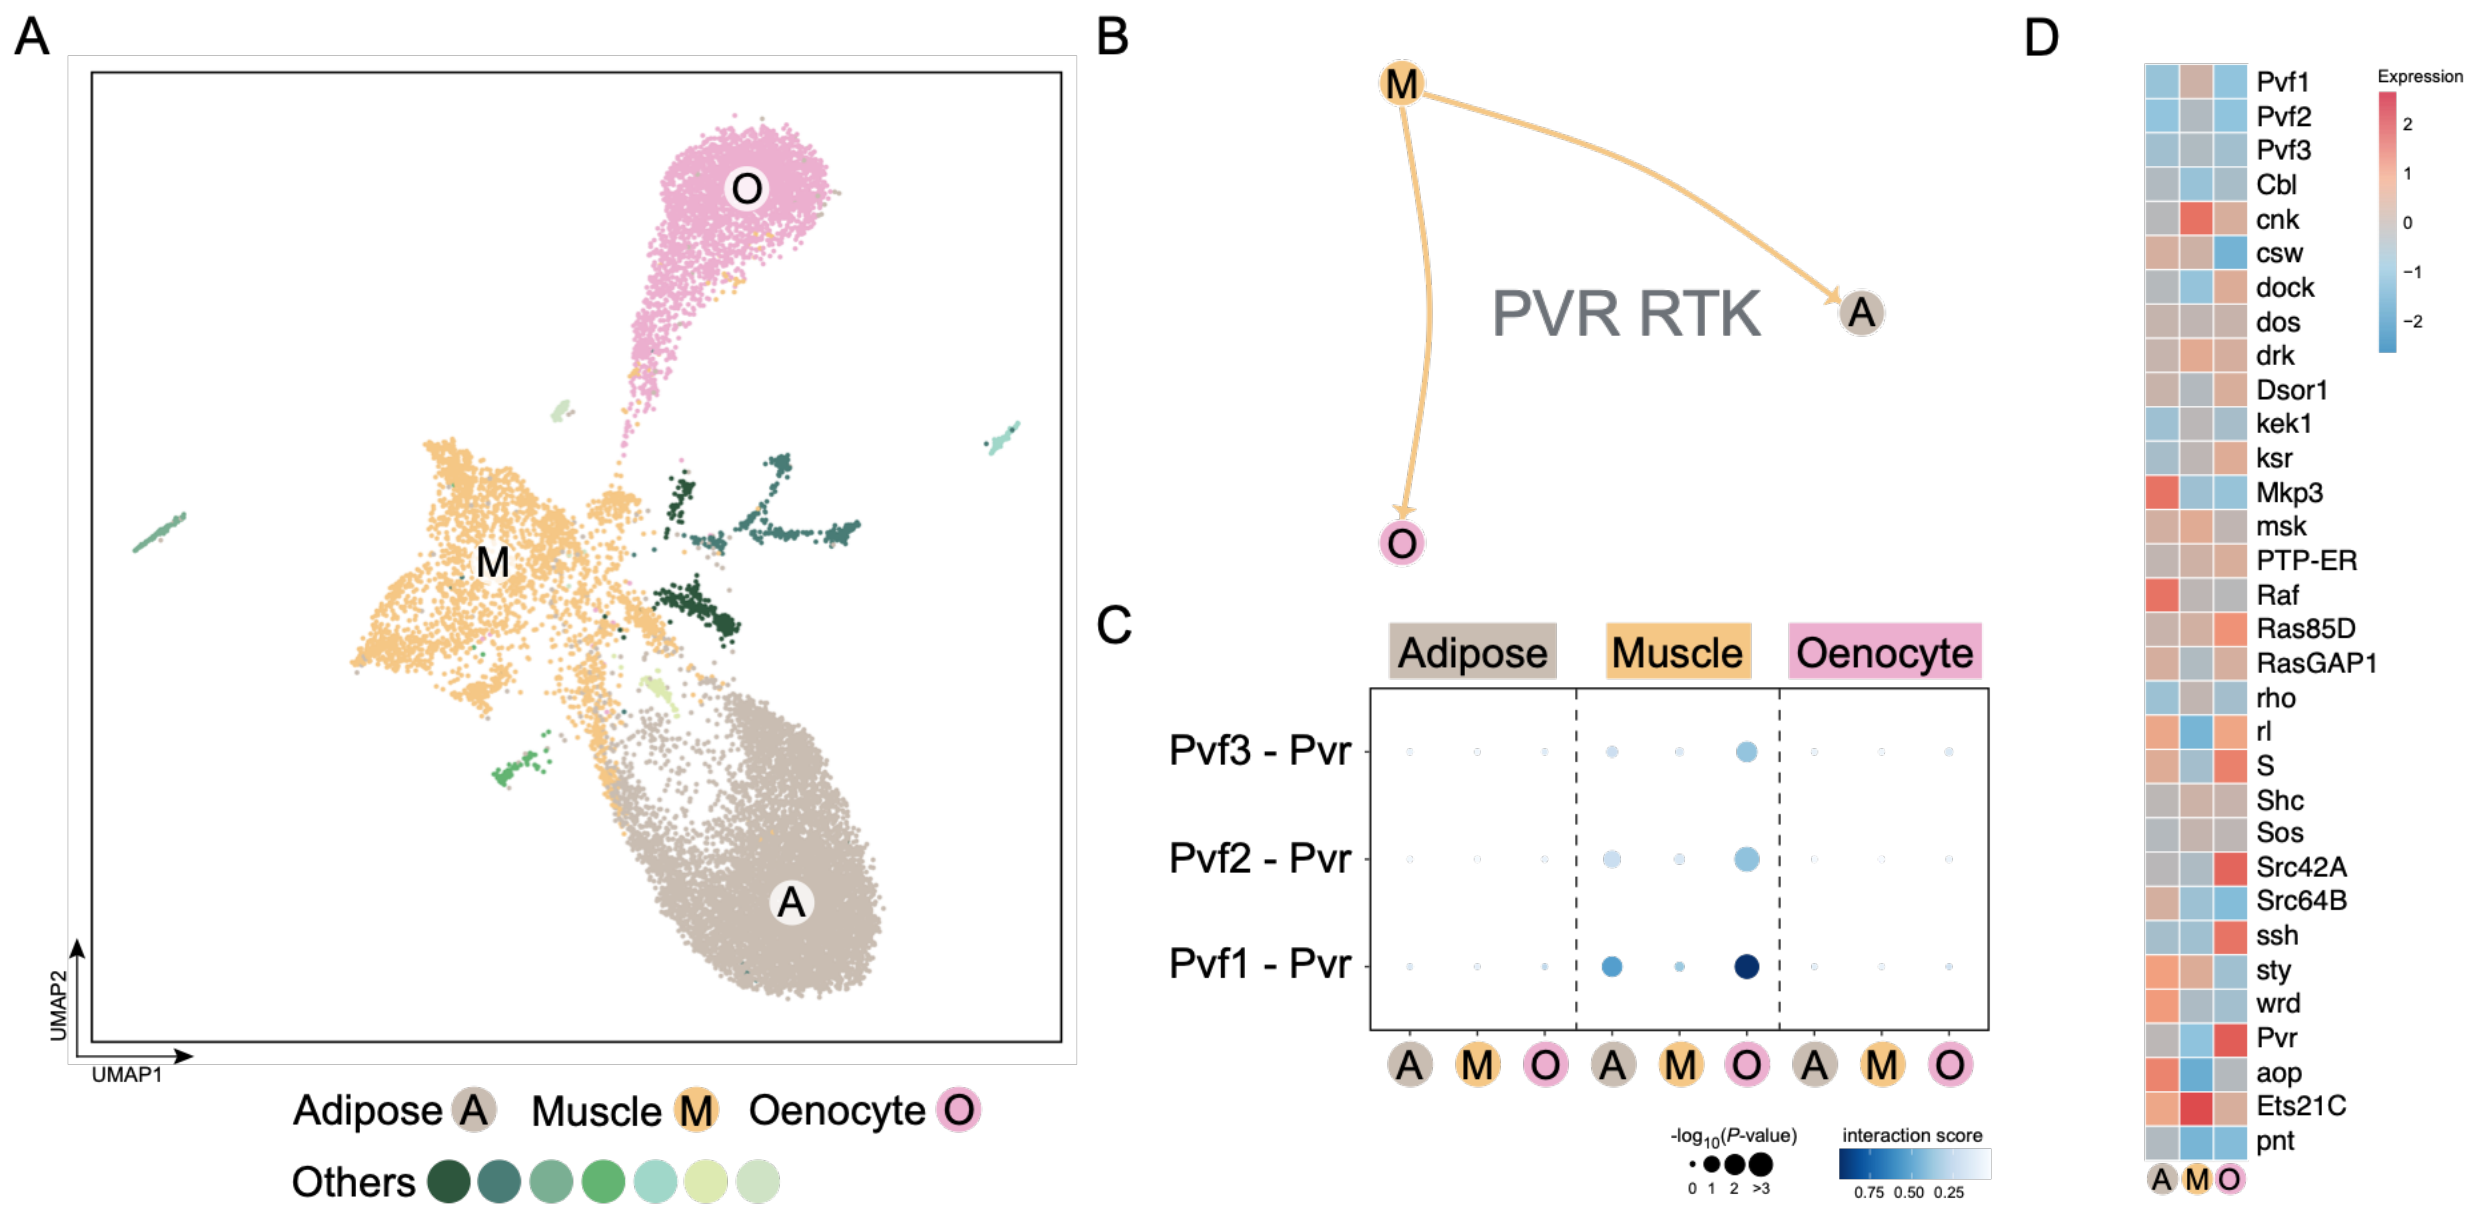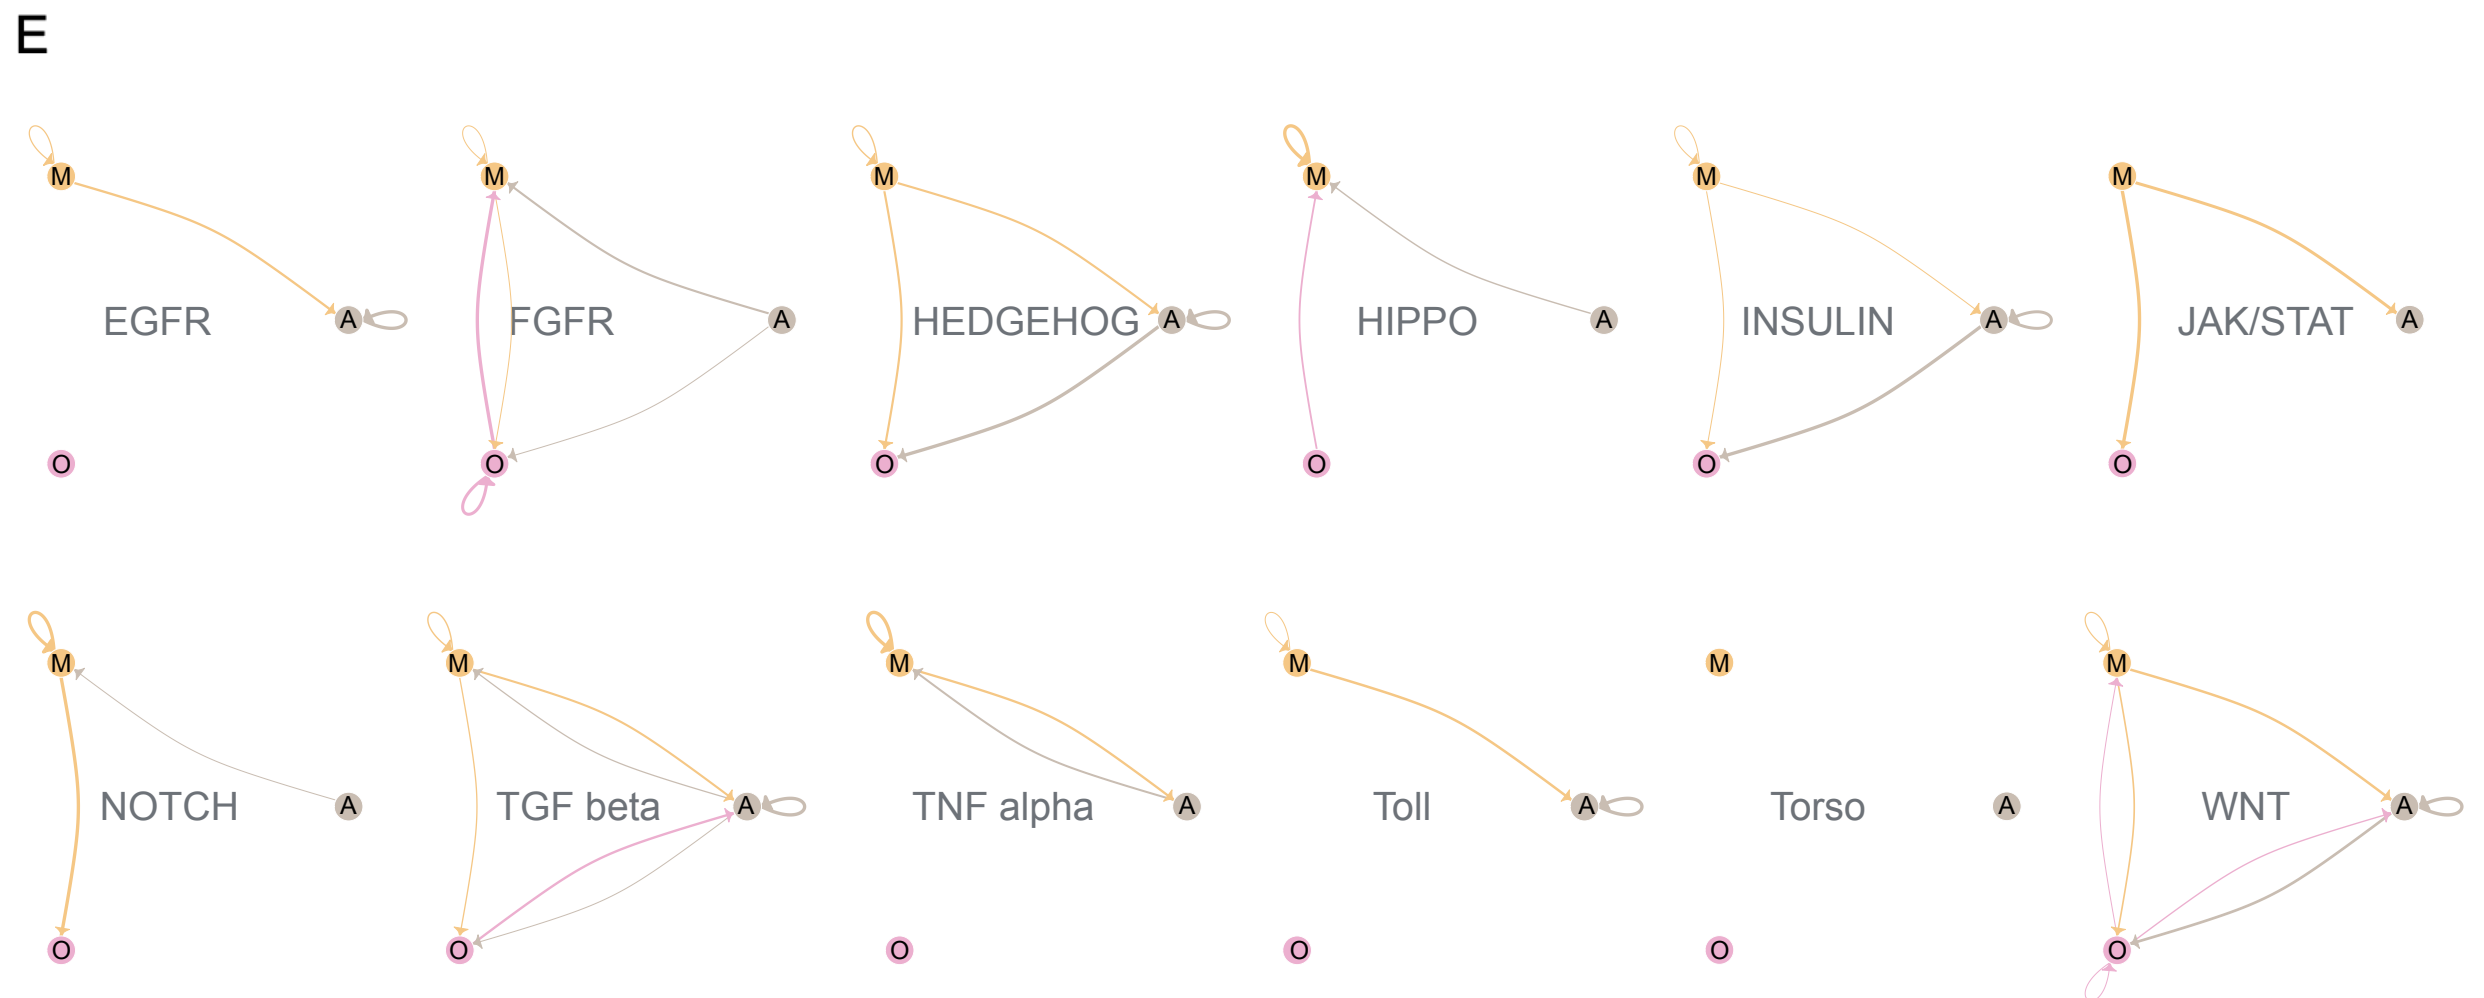

Supplement: iyab235_supplementary_figure2.pdf [file iyab235_supplementary_figure2.pdf]
